# Supplementary material
Source: PubMed Central journal article supplement (PMC2148297)

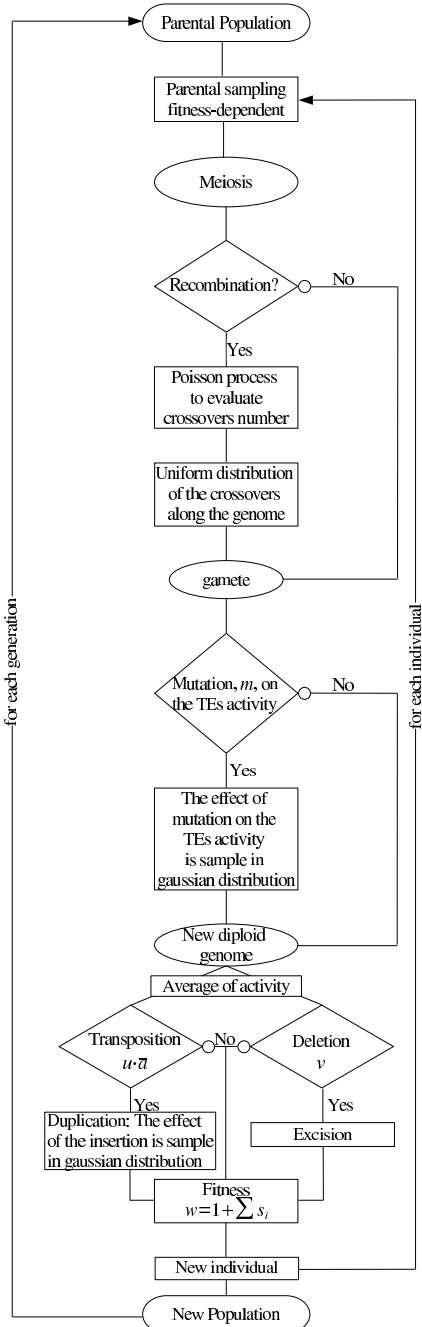

Supplement: pnas_0705238104_1.pdf [file pnas_0705238104_1.pdf]

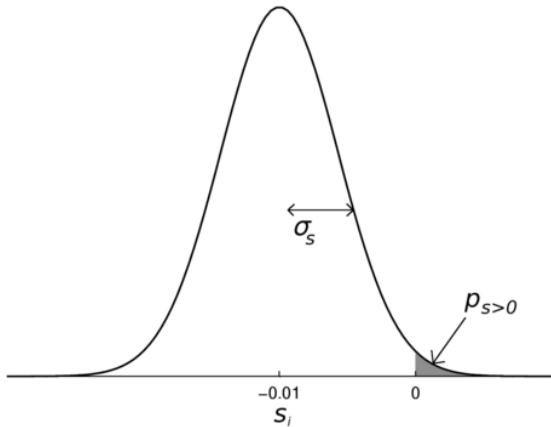

| $\sigma_s$ | $p_{s>0}$ |
|------------|-----------|
| 0.00270    | 0.01%     |
| 0.00304    | 0.05%     |
| 0.00324    | 0.1%      |
| 0.00388    | 0.5%      |
| 0.00431    | 1%        |

Supplement: pnas_0705238104_2.pdf [file pnas_0705238104_2.pdf]

# Equilibrium

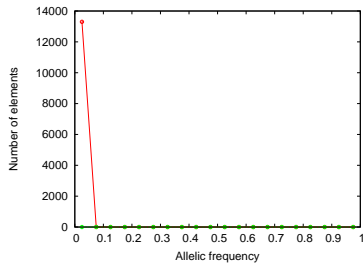

# Cycles (increase)

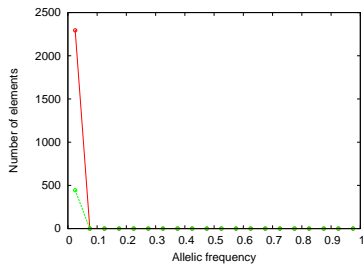

# Cycles (optimum)

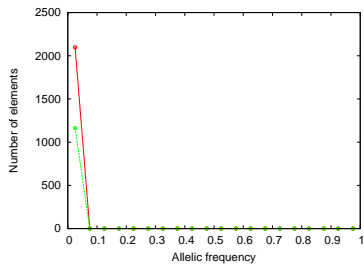

# Cycles (decrease)

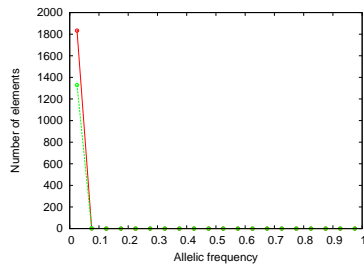

# Domestication

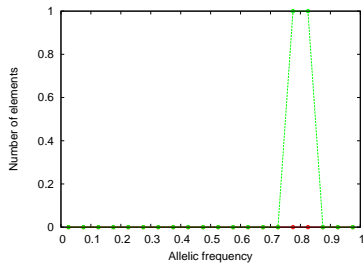

Supplement: pnas_0705238104_3.pdf [file pnas_0705238104_3.pdf]

## Adaptive insertion probability

0.01%

0.05%

0.1%

0.5%

1%

 $10^{-3}$ 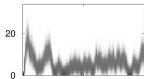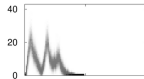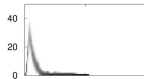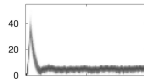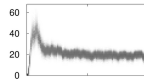 $10^{-4}$ 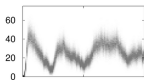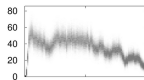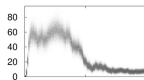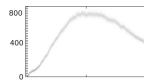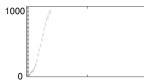 $10^{-5}$ 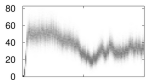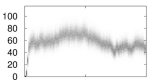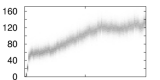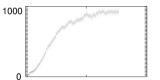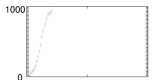

Supplement: pnas_0705238104_4.pdf [file pnas_0705238104_4.pdf]

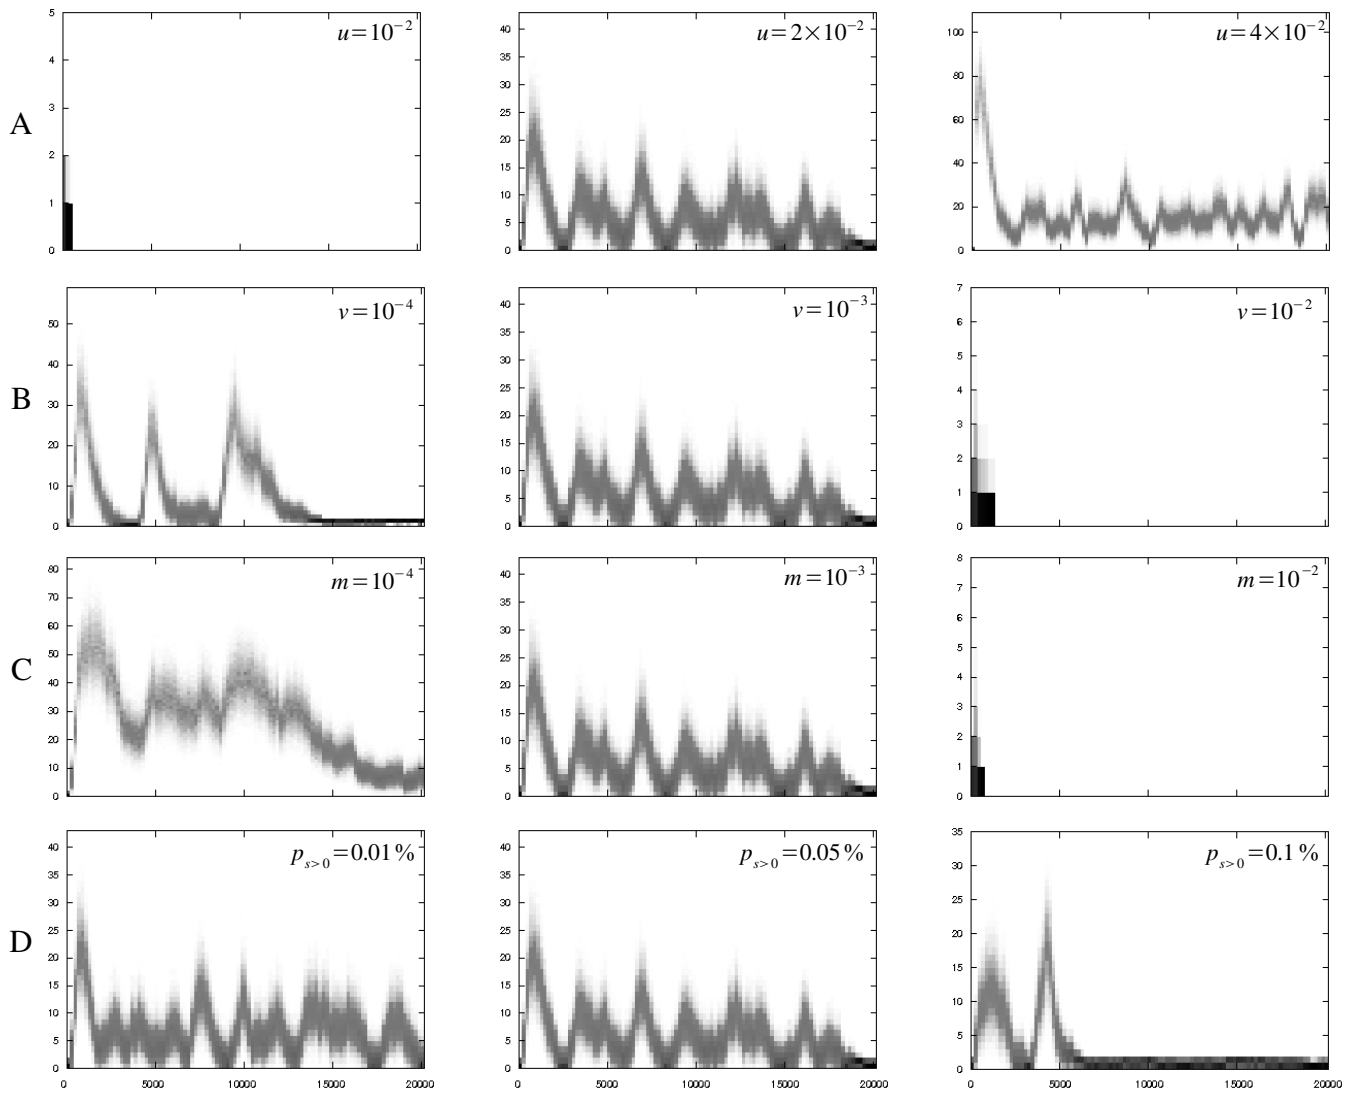

Supplement: pnas_0705238104_5.pdf [file pnas_0705238104_5.pdf]

A

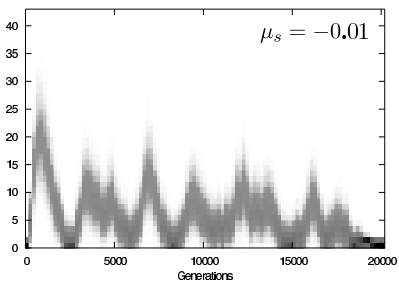

B

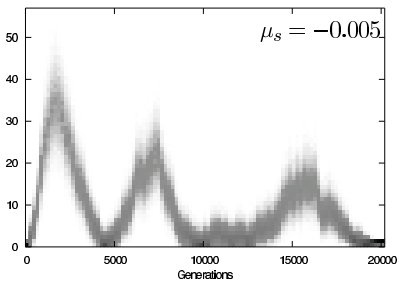

C

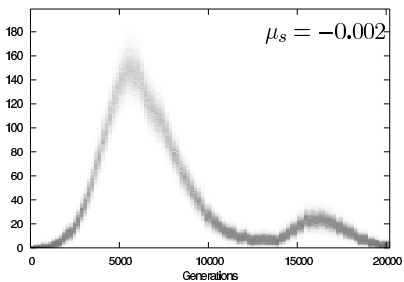

Supplement: pnas_0705238104_6.pdf [file pnas_0705238104_6.pdf]
